# Supplementary material for: Formin-mediated bridging of cell wall, plasma membrane, and cytoskeleton in symbiotic infections of Medicago truncatula
Source: PubMed Central journal article supplement (PMC8231094; doi:10.1016/j.cub.2021.04.002), 2021-06-21
Supplement: mmc1.pdf [file mmc1.pdf]

**Current Biology, Volume 31**

**Supplemental Information**

**Formin-mediated bridging of cell wall, plasma  
membrane, and cytoskeleton in symbiotic  
infections of *Medicago truncatula***

**Pengbo Liang, Clara Schmitz, Beatrice Lace, Franck Anicet Ditengou, Chao Su, Eija Schulze, Julian Knerr, Robert Grosse, Jean Keller, Cyril Libourel, Pierre-Marc Delaux, and Thomas Ott**

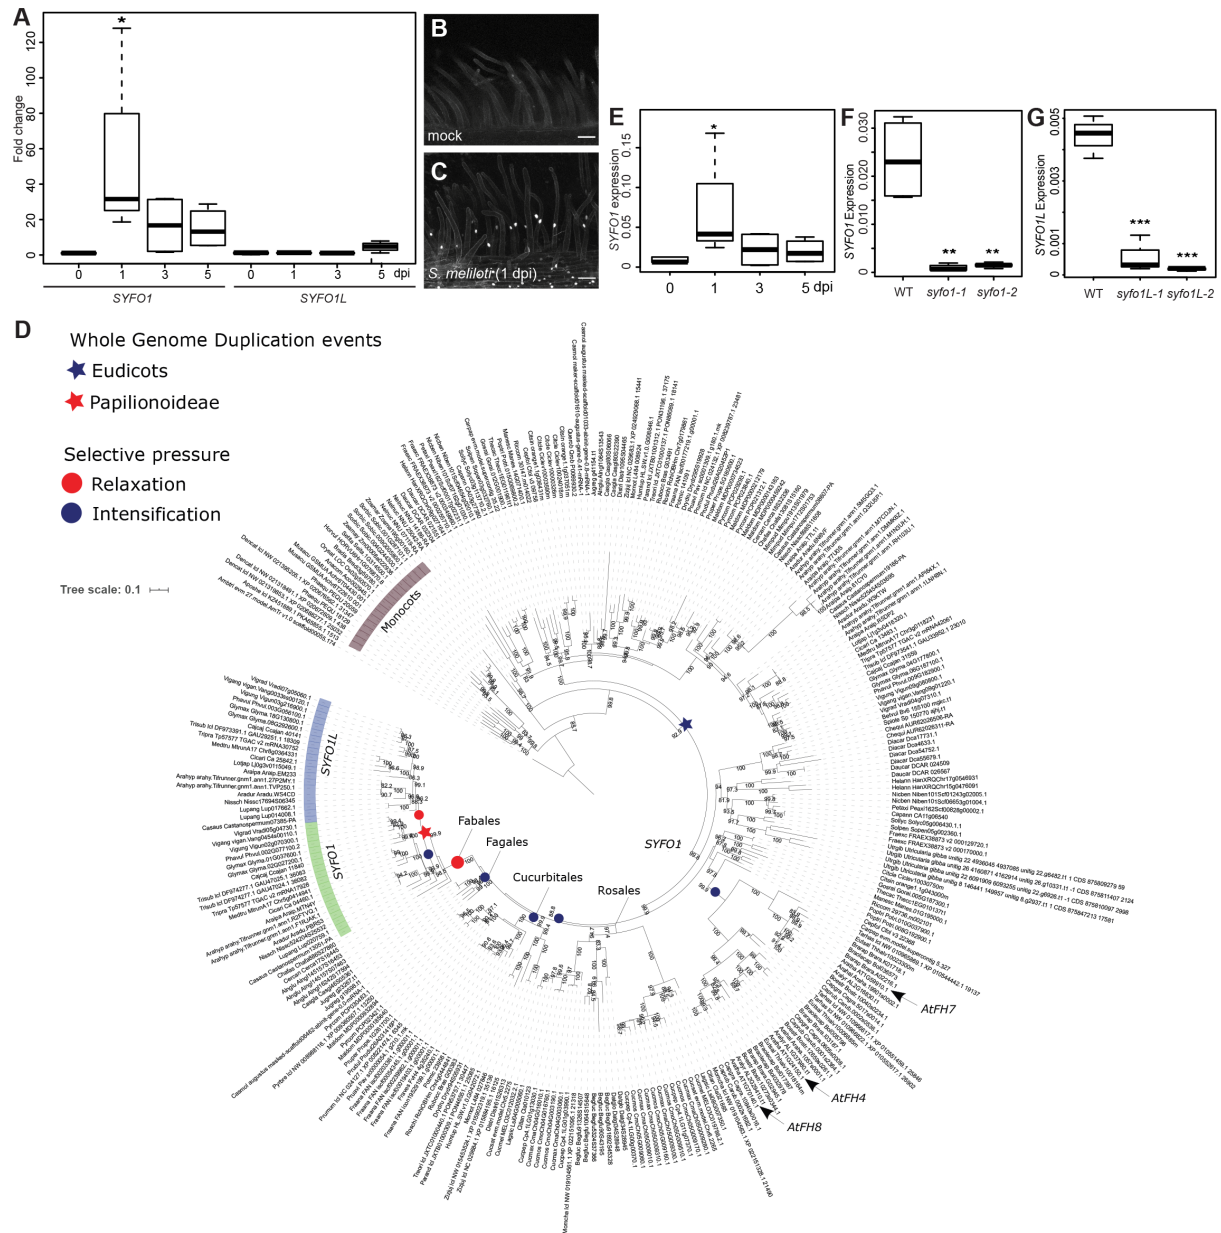

**Figure S1. SYFO1 contributes to the symbiosis establishment. Related to Figure 1. (A)** *SYFO1* and *SYFO1L* transcript levels before inoculation, at 1, 3 and 5 dpi. **(B-C)** Promoter activity was assessed with cellular resolution in transgenic *M. truncatula* root hairs by using the genetically encoded reporter *ProSYFO1:NLS-2xGFP*. **(D)** Maximum Likelihood tree (model: TIM3+F+R6; Log-likelihood: -124347.2322) of *SYFO1* and *SYFO1L* family in 102 Angiosperm species. The tree was rooted on *Amborella trichopoda*. The Eudicots duplication leading to the emergence of the *SYFO1*/*SYFO1L* clade is indicated with a blue star and the *Papilionoideae* duplication from which *SYFO1* and *SYFO1L* derived is indicated with a red star. Monocots, *SYFO1* and *SYFO1L* clades are indicated by violet, green and blue ribbons respectively. Results of the selective pressure analysis are marked as follow: red dots indicate relaxation ( $K < 1$  and  $p\text{-val} < 0.01$ ) of the selection in the clade while blue dots stand for an intensification of the selection ( $K > 1$  and  $p\text{-val} < 0.01$ ). Details of selective pressure analysis are presented in Table S3. **(E)** Relative expression of *SYFO1* in inoculated roots. **(F-G)** Determining transcript levels in Tnt1 insertion lines. *SYFO1* transcript levels in wild-type R108, *syfo1-1*, *syfo1-2* at 1 dpi, and wild-type R108 *syfo1L-*

*I. syfoLL-2* without inoculation. Quantitative qRT-PCR was performed on cDNAs obtained from roots, with 4 biological replicates (each replicate contained roots from four independent plants). The graphs represent  $\Delta\Delta Ct$  values obtained by qRT-PCR relative to ubiquitin. Asterisks indicate a significant statistical difference based on a Tukey–Kramer multiple-comparison test with p-values of  $p < 0.05$  (\*),  $p < 0.01$  (\*\*), and  $p < 0.001$  (\*\*\*). Scale bars indicate 50  $\mu\text{m}$  (B-C).

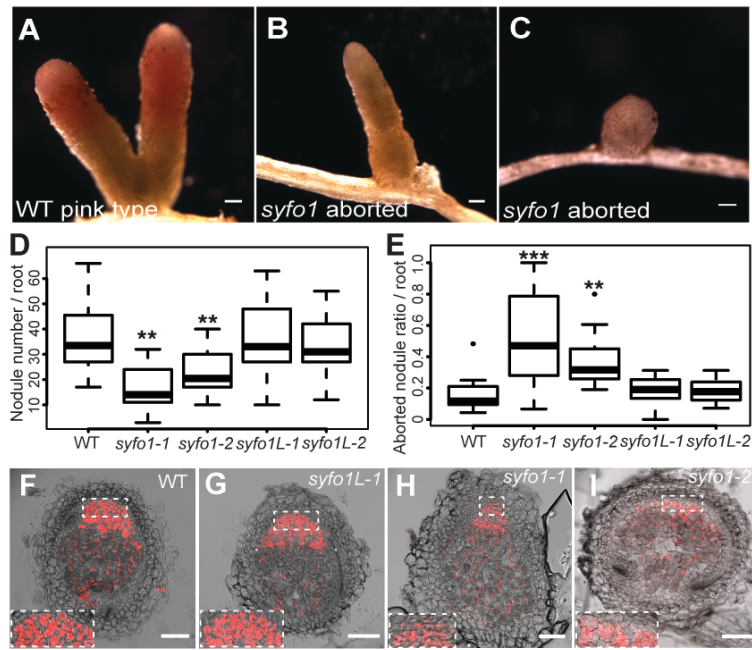

**Figure S2. SYFO1 but not SYFO1L is required for nodulation. Related to Figure 1.** (A-C) Nodule phenotypes observed on the different genotypes at 3 wpi with *S. meliloti* in open pots using WT R108 plants as a control. Quantification of nodule numbers (D) and the ratio of aborted/wild-type like nodules (E) (n=10 independent root systems per genotype). Semi-thin (60 μm) sections of agarose-embedded nodules representative for wild-type (F), *syfo1L* (G) and *syfo1* (H-I). The dashed rectangles indicate the magnified selected zones. Plants were grown in open pots and inoculated for 3 weeks with *S. meliloti* (red) prior to the analysis. Asterisks indicate a significant statistical difference based on a Tukey–Kramer multiple-comparison test with p-values <0.01 (\*\*), <0.001 (\*\*\*). Data are shown as mean ± SE. Scale bars indicate 200 μm (A-C), 100 μm (F-I).

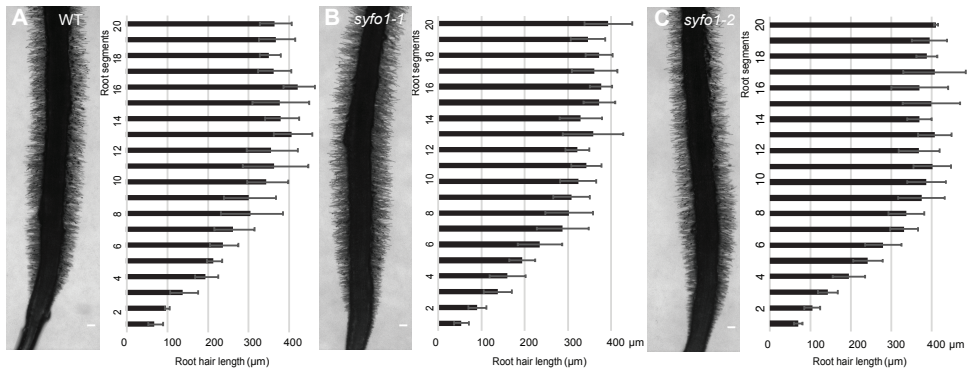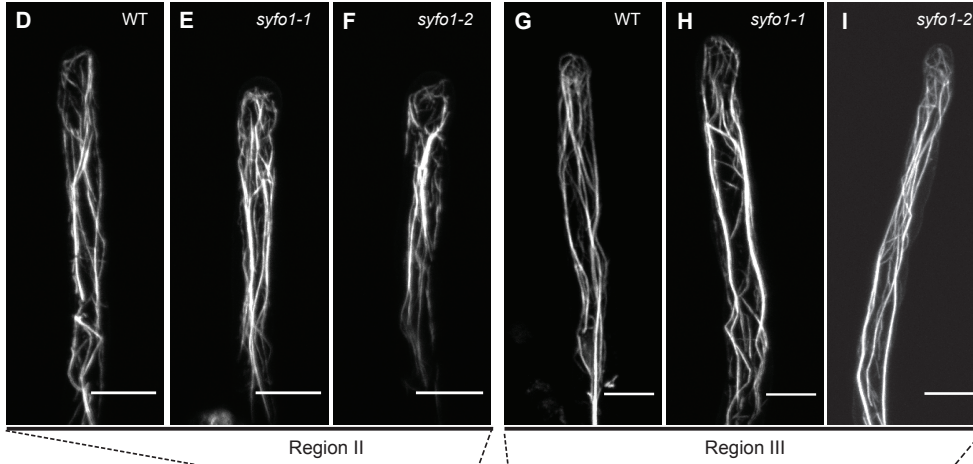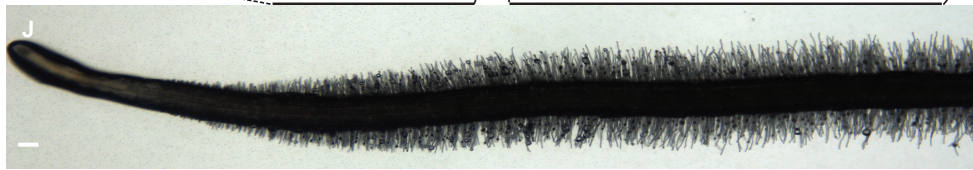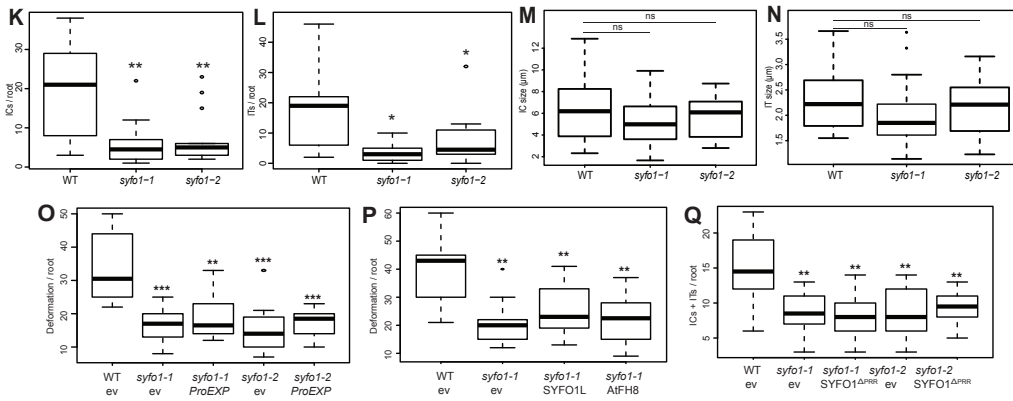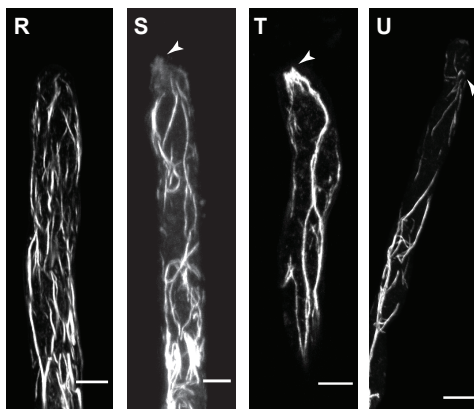

**V**

| genotype       | $n_{\text{polar}}$ | $n_{\text{total}}$ | % of $n_{\text{total}}$ |
|----------------|--------------------|--------------------|-------------------------|
| WT             | 35                 | 40                 | 88                      |
| <i>syfo1-1</i> | 11                 | 35                 | 31                      |
| <i>syfo1-2</i> | 5                  | 20                 | 25                      |

**Figure S3. Analysis of actin and morphological patterns in symbiotically responding root hairs. Related to Figures 1 and 2.**

Root hairs grow normally (*A-C*) and actin arrangements are indistinguishable in young, uninoculated root hairs of on *syfo1-1* and *syfo1-2* mutants (*D-J*). Plants were grown on vertical agar plates in the absence of rhizobia for 10 days prior to the analysis. Root hair length was measured in 20 consecutive root segments covering the designated infection zone (3 mm above the root hair tip). No statistically significant differences were found based on an ANOVA followed by a Fisher LSD test when comparing root hair length in between the corresponding root segment of the different genotypes. Data are shown as mean  $\pm$  SE of 4 independent biological replicates with four roots being scored per experiment and genotype. Phalloidin staining of actin in root hairs of the differentiation zone (region II; *D-F*) and elongation zone (region III; *G-I*) as illustrated in *J*.

Dissecting early root hair responsiveness in *syfo1* mutants (*K-N*). The number of infection chambers (ICs) (*K*) and infection threads (ITs) (*L*) per root and the individual sizes of ICs (*M*) and ITs (*N*) were scored at 5 dpi in R108 wild-type as well as *syfo1-1* and *syfo1-2* mutant alleles. Asterisks indicate a significant statistical difference based on a Tukey–Kramer multiple-comparison test with p-values  $<0.05$  (\*) and  $0.01$  (\*\*). Data are shown as mean  $\pm$  SE and were obtained from 9-14 independent plants (*K, L*) and from 13 plant for (*M, N*). Complementation studies for *syfo1* mutants (*O-Q*). (*O*) *SYFO1* driven by the epidermis specific expansin promoter (*ProEXP*) failed to restore the deformation phenotype in *syfo1* mutants. (*P*) The *syfo1* root hair deformation phenotype could not be complemented by expressing *SYFOIL* and *AtFH8* driven by *SYFO1* promoter. (*Q*) The PRR segment in the *SYFO1* extracellular domain is required for its function as a *SYFO1* <sup>$\Delta$ PRR</sup> variant driven by the *SYFO1* promoter was not able to restore the infection thread and infection chamber phenotypes in *syfo1* mutants. ev= empty vector. Asterisks indicate a significant statistical difference based on a Tukey–Kramer multiple-comparison test with p-values  $< 0.01$  (\*\*) and  $0.001$  (\*\*\*)). Data were obtained from 10 independent roots for each analysis.

Analysis of actin polarization upon rhizobial inoculation (*R-V*). Actin patterns were visualized by Phalloidin staining of root hairs and observed under non-inoculated (*R*) and inoculated conditions after 2 dpi with *S. meliloti* (*S-U*). Representative images for longitudinal alignment of actin filaments in the absence of rhizobia in wild type (*R*), apically polarized actin (*S, T*) and polarized actin at the apical shank of root hairs (*U*) upon inoculation of wild-type root hairs. The appearance of polarized patterns ( $n_{\text{polar}}$ ) as shown in panels *S-U* was scored on wild-type and *syfo1* mutant roots by absent/present calls of appearance on individual root systems (*V*). Arrowheads indicate sites of polarized actin accumulations. Scale bars indicate 200  $\mu\text{m}$  (*A-C, G*). Scale bars indicate 10  $\mu\text{m}$  (*D-I, and R-U*).

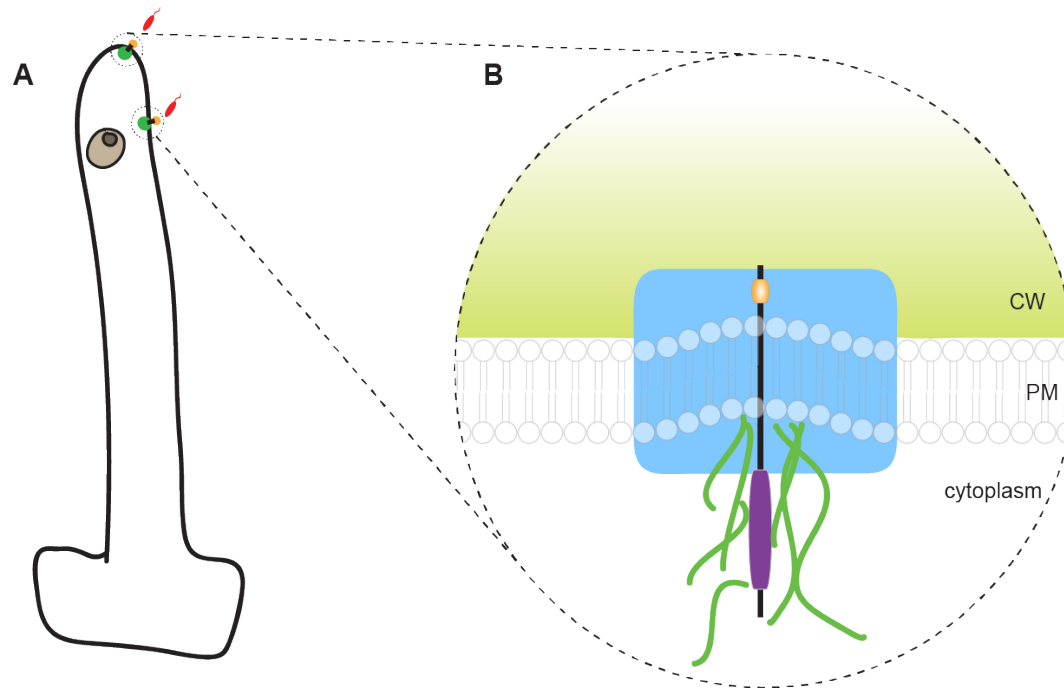

**Figure S4. Proposed model for a SYFO1-mediated actin-plasma membrane-cell wall-continuum. Related to Figures 3 and 4.** Our data suggest that SYFO1 establishes actin nucleation centres at the tip or the apical part of the shank of growing root hairs (green) upon inoculation with rhizobia (red) (*A*). (*B*) Association with the cell wall (CW; light green) by the proline-rich extracellular domain of SYFO1 (orange) laterally immobilizes SYFO1. Polar secretion of SYFO1 together with other membrane constituents and SYFO1-mediated actin nucleation (green filaments) may allow the formation of a polarity domain (bright blue). PM= plasma membrane. The FH1FH2 domain is depicted in purple.

| Gene ID        | Description                                       |
|----------------|---------------------------------------------------|
| Medtr2g086990  | formin-like 2 domain protein                      |
| Medtr4g045670  | formin-like 2 domain protein                      |
| Medtr4g095780  | formin-like 2 domain protein                      |
| Medtr8g027995  | formin-like 2 domain protein                      |
| Medtr7g080920  | formin-like 2 domain protein                      |
| Medtr4g087890  | formin-like 2 domain protein                      |
| Medtr5g015690  | formin-like 2 domain protein                      |
| Medtr5g036540  | formin-like 2 domain protein                      |
| Medtr3g078623  | formin-like 2 domain protein                      |
| Medtr1g083260  | formin-like 2 domain protein                      |
| Medtr2g082190  | formin-like 2 domain protein                      |
| Medtr4g081410  | formin-like 2 domain protein                      |
| Medtr0094s0010 | formin-like 2 domain protein                      |
| Medtr8g062830  | formin-like 2 domain protein                      |
| Medtr3g037080  | actin-binding FH2 (formin-like) protein, putative |
| Medtr4g109040  | actin-binding FH2 (formin-like) protein           |
| Medtr1g013800  | actin-binding FH2 (formin 2) family protein       |
| Medtr4g131020  | actin-binding FH2 (formin 2) family protein       |
| Medtr4g109040  | actin-binding FH2 (formin-like) protein           |
| Medtr5g026645  | actin-binding FH2 (formin-like) protein           |

**Table S1: FH2-domain containing proteins identified in the *Medicago truncatula* genome. Related to Figure 1.**



| Abbreviation | Species                                        | Order          | Family          | Reference                                                                                                                                                       | N-fixing |
|--------------|------------------------------------------------|----------------|-----------------|-----------------------------------------------------------------------------------------------------------------------------------------------------------------|----------|
| Alnglu       | <i>Alnus glutinosa</i>                         | Fagales        | Betulaceae      | 10.1126/science.aat1743                                                                                                                                         | 1        |
| Ambtri       | <i>Amborella trichopoda</i>                    | Amborellales   | Amborellaceae   | 10.1126/science.1241089                                                                                                                                         | 0        |
| Anacom       | <i>Ananas comosus</i>                          | Bromeliales    | Bromeliaceae    | 10.1038/ng.3435                                                                                                                                                 | 0        |
| Aposhe       | <i>Apostasia shenzhenica</i>                   | Asparagales    | Orchidaceae     | 10.1038/nature23897                                                                                                                                             | 0        |
| Arahal       | <i>Arabidopsis halleri</i>                     | Brassicales    | Brassicaceae    | Phytozome                                                                                                                                                       | 0        |
| Aralyr       | <i>Arabidopsis lyrata</i>                      | Brassicales    | Brassicaceae    | 10.1038/ng.807                                                                                                                                                  | 0        |
| Aratha       | <i>Arabidopsis thaliana</i>                    | Brassicales    | Brassicaceae    | 10.1093/nar/gkr1090                                                                                                                                             | 0        |
| Aradur       | <i>Arachis duranensis</i>                      | Fabales        | Fabaceae        | 10.1038/ng.3517                                                                                                                                                 | 1        |
| Arahyp       | <i>Arachis hypogaea</i>                        | Fabales        | Fabaceae        | <a href="https://peanutbase.org/data/public/Arachis_hypogaea/Tifrunner.gnm1.KYV3/">https://peanutbase.org/data/public/Arachis_hypogaea/Tifrunner.gnm1.KYV3/</a> | 1        |
| Araipa       | <i>Arachis ipaensis</i>                        | Fabales        | Fabaceae        | 10.1038/ng.3517                                                                                                                                                 | 1        |
| Begfuc       | <i>Begonia fuchsoides</i>                      | Cucurbitales   | Begoniaceae     | 10.1126/science.aat1743                                                                                                                                         | 0        |
| Betvul       | <i>Beta vulgaris ssp. vulgaris KWS2320</i>     | Caryophyllales | Amaranthaceae   | 10.1038/nature12817                                                                                                                                             | 0        |
| Boestr       | <i>Boechera stricta</i>                        | Brassicales    | Brassicaceae    | Phytozome                                                                                                                                                       | 0        |
| Bradis       | <i>Brachypodium distachyon</i>                 | Poales         | Poaceae         | 10.1038/nature08747                                                                                                                                             | 0        |
| Braolecap    | <i>Brassica oleraceae capitata</i>             | Brassicales    | Brassicaceae    | 10.1038/ncomms4930                                                                                                                                              | 0        |
| Brarap       | <i>Brassica rapa FPsc</i>                      | Brassicales    | Brassicaceae    | Phytozome                                                                                                                                                       | 0        |
| Cajcaj       | <i>Cajanus cajan</i>                           | Fabales        | Fabaceae        | 10.1038/nbt.2022.                                                                                                                                               | 1        |
| Capgra       | <i>Capsella grandiflora</i>                    | Brassicales    | Brassicaceae    | 10.1038/ng.2669                                                                                                                                                 | 0        |
| Caprub       | <i>Capsella rubella</i>                        | Brassicales    | Brassicaceae    | 10.1038/ng.2669                                                                                                                                                 | 0        |
| Capann       | <i>Capsicum annuum cvCM334</i>                 | Solanales      | Solanaceae      | 10.1038/ng.2877                                                                                                                                                 | 0        |
| Carpap       | <i>Carica papaya</i>                           | Brassicales    | Caricaceae      | 10.1038/nature06856                                                                                                                                             | 0        |
| Casmol       | <i>Castanea mollissima</i>                     | Fagales        | Fagaceae        | <a href="https://www.hardwoodgenomics.org/organism/Castanea/mollissima">https://www.hardwoodgenomics.org/organism/Castanea/mollissima</a>                       | 0        |
| Casaus       | <i>Castanospermum australe</i>                 | Fabales        | Fabaceae        | 10.1126/science.aat1743                                                                                                                                         | 0        |
| Casgla       | <i>Casuarina glauca</i>                        | Fagales        | Casuarinaceae   | 10.1126/science.aat1743                                                                                                                                         | 1        |
| Cepfol       | <i>Cephalotus follicularis</i>                 | Oxalidales     | Cephalotaceae   | 10.1038/s41559-016-0059                                                                                                                                         | 0        |
| Cercan       | <i>Cercis canadensis</i>                       | Fabales        | Caesalpiniaceae | 10.1126/science.aat1743                                                                                                                                         | 0        |
| Chafas       | <i>Chamaecrista fasciculata</i>                | Fabales        | Fabaceae        | 10.1126/science.aat1743                                                                                                                                         | 1        |
| Chequi       | <i>Chenopodium quinoa</i>                      | Caryophyllales | Amaranthaceae   | 10.1038/nature21370                                                                                                                                             | 0        |
| Cicari       | <i>Cicer arietinum ICC4958</i>                 | Fabales        | Fabaceae        | 10.1038/srep12806                                                                                                                                               | 1        |
| Citlan       | <i>Citrullus lanatus subsp. vulgaris 97103</i> | Cucurbitales   | Cucurbitaceae   | 10.1038/ng.2470                                                                                                                                                 | 0        |
| Citcle       | <i>Citrus clementina</i>                       | Sapindales     | Rutaceae        | 10.1038/nbt.2906                                                                                                                                                | 0        |
| Citsin       | <i>Citrus sinensis</i>                         | Sapindales     | Rutaceae        | 10.1038/nbt.2906                                                                                                                                                | 0        |
| Cucmel       | <i>Cucumis melo</i>                            | Cucurbitales   | Cucurbitaceae   | 10.1073/pnas.1205415109                                                                                                                                         | 0        |
| Cucsat       | <i>Cucumis sativus PI183967</i>                | Cucurbitales   | Cucurbitaceae   | 10.1038/ng.2801                                                                                                                                                 | 0        |
| Cucmax       | <i>Cucurbita maxima</i>                        | Cucurbitales   | Cucurbitaceae   | 10.1016/j.molp.2017.09.003                                                                                                                                      | 0        |
| Cucmos       | <i>Cucurbita moschata</i>                      | Cucurbitales   | Cucurbitaceae   | 10.1016/j.molp.2017.09.004                                                                                                                                      | 0        |
| Cucpep       | <i>Cucurbita pepo</i>                          | Cucurbitales   | Cucurbitaceae   | <a href="http://cucurbitgenomics.org/organism/13">http://cucurbitgenomics.org/organism/13</a>                                                                   | 0        |
| Datglo       | <i>Datisca glomerata</i>                       | Cucurbitales   | Dasticaceae     | 10.1126/science.aat1743                                                                                                                                         | 0        |
| Daucar       | <i>Daucus carota</i>                           | Apiales        | Apiaceae        | 10.1038/ng.3565                                                                                                                                                 | 0        |
| Dencat       | <i>Dendrobium catenatum</i>                    | Asparagales    | Orchidaceae     | 10.1038/nature23897                                                                                                                                             | 0        |
| Diacar       | <i>Dianthus caryophyllus</i>                   | Caryophyllales | Caryophyllaceae | 10.1093/dnares/dst053                                                                                                                                           | 0        |
| Distri       | <i>Discaria trinervis</i>                      | Rosales        | Rhamnaceae      | 10.1126/science.aat1743                                                                                                                                         | 1        |
| Drydru       | <i>Dryas drummondii</i>                        | Rosales        | Rosaceae        | 10.1126/science.aat1743                                                                                                                                         | 1        |
| Eutsal       | <i>Eutrema salsugineum</i>                     | Brassicales    | Brassicaceae    | 10.3389/fpls.2013.00046                                                                                                                                         | 0        |
| Fraves       | <i>Fragaria vesca</i>                          | Rosales        | Rosaceae        | 10.1038/ng.740                                                                                                                                                  | 0        |
| Fraana       | <i>Fragaria x ananassa</i>                     | Rosales        | Rosaceae        | <a href="https://www.rosaceae.org/species/fragaria/fragaria_x_ananassa">https://www.rosaceae.org/species/fragaria/fragaria_x_ananassa</a>                       | 0        |
| Fraexc       | <i>Fraxinus excelsior</i>                      | Lamiales       | Oleaceae        | 10.1038/nature20786                                                                                                                                             | 0        |

|        |                               |                |                  |                                                                                                                                                               |   |
|--------|-------------------------------|----------------|------------------|---------------------------------------------------------------------------------------------------------------------------------------------------------------|---|
| Glymax | <i>Glycine max</i>            | Fabales        | Fabaceae         | 10.1038/nature08670                                                                                                                                           | 1 |
| Gosrai | <i>Gossypium raimondii</i>    | Malvales       | Malvaceae        | 10.1038/nature11798                                                                                                                                           | 0 |
| Helann | <i>Helianthus annuus</i>      | Asterales      | Asteraceae       | 10.1038/nature22380                                                                                                                                           | 0 |
| Horvul | <i>Hordeum vulgare</i>        | Poales         | Poaceae          | 10.1038/nature22043 / 10.1038/sdata.2017.44                                                                                                                   | 0 |
| Humlup | <i>Humulus lupulus</i>        | Rosales        | Cannabaceae      | 10.1093/pcp/pcu169                                                                                                                                            | 0 |
| Jugreg | <i>Juglans regia</i>          | Fagales        | Juglandaceae     | 10.1111/tpj.13207                                                                                                                                             | 0 |
| Lagsic | <i>Lagenaria siceraria</i>    | Cucurbitales   | Cucurbitaceae    | 10.1111/tpj.13722                                                                                                                                             | 0 |
| Lotjap | <i>Lotus japonicus</i>        | Fabales        | Fabaceae         | 10.1093/dnares/dsn008                                                                                                                                         | 1 |
| Lupang | <i>Lupinus angustifolius</i>  | Fabales        | Fabaceae         | 10.1111/pbi.12615                                                                                                                                             | 1 |
| Maldom | <i>Malus domestica</i>        | Rosales        | Rosaceae         | <a href="https://www.rosaceae.org/species/malus/malus_x_domestica/genome_v3.0.a0">https://www.rosaceae.org/species/malus/malus_x_domestica/genome_v3.0.a0</a> | 0 |
| Manesc | <i>Manihot esculenta</i>      | Malpighiales   | Euphorbiaceae    | 10.1038/nbt.3535                                                                                                                                              | 0 |
| Medtru | <i>Medicago truncatula</i>    | Fabales        | Fabaceae         | 10.1038/s41477-018-0286-7                                                                                                                                     | 1 |
| Mimpud | <i>Mimosa pudica</i>          | Fabales        | Fabaceae         | 10.1126/science.aat1743                                                                                                                                       | 1 |
| Momcha | <i>Momordica charantia</i>    | Cucurbitales   | Cucurbitaceae    | <a href="https://www.ncbi.nlm.nih.gov/assembly/GCF_001995035.0">https://www.ncbi.nlm.nih.gov/assembly/GCF_001995035.0</a>                                     | 0 |
| Mornot | <i>Morus notabilis</i>        | Rosales        | Moraceae         | 10.1038/ncomms3445                                                                                                                                            | 0 |
| Musacu | <i>Musa acuminata</i>         | Zingiberales   | Zingiberaceae    | 10.1093/database/bat035                                                                                                                                       | 0 |
| Nelnuc | <i>Nelumbo nucifera</i>       | Proteales      | Nelumbonaceae    | 10.1186/gb-2013-14-5-r41                                                                                                                                      | 0 |
| Nicben | <i>Nicotiana benthamiana</i>  | Solanales      | Solanaceae       | 10.1094/MPMI-06-12-0148-TA                                                                                                                                    | 0 |
| Nissch | <i>Nissolia schottii</i>      | Fabales        | Fabaceae         | 10.1126/science.aat1743                                                                                                                                       | 0 |
| Orysat | <i>Oryza sativa</i>           | Poales         | Poaceae          | 10.1093/nar/gki976                                                                                                                                            | 0 |
| Parand | <i>Parasponia andersonii</i>  | Rosales        | Cannabaceae      | 10.1073/pnas.1721395115                                                                                                                                       | 1 |
| Petaxi | <i>Petunia axillaris</i>      | Solanales      | Solanaceae       | 10.1038/nplants.2016.74                                                                                                                                       | 0 |
| Phaequ | <i>Phalaenopsis equestris</i> | Asparagales    | Orchidaceae      | 10.1038/nature23897                                                                                                                                           | 0 |
| Phavul | <i>Phaseolus vulgaris</i>     | Fabales        | Fabaceae         | 10.1038/ng.3008                                                                                                                                               | 1 |
| Poptri | <i>Populus trichocarpa</i>    | Malpighiales   | Salicaceae       | 10.1126/science.1128691                                                                                                                                       | 0 |
| Potmic | <i>Potentilla micrantha</i>   | Rosales        | Rosaceae         | 10.1093/gigascience/giy010                                                                                                                                    | 0 |
| Pruavi | <i>Prunus avium</i>           | Rosales        | Rosaceae         | 10.1093/dnares/dsx020                                                                                                                                         | 0 |
| Prudul | <i>Prunus dulcis</i>          | Rosales        | Rosaceae         | <a href="https://www.rosaceae.org/analysis/294">https://www.rosaceae.org/analysis/294</a>                                                                     | 0 |
| Prumum | <i>Prunus mume</i>            | Rosales        | Rosaceae         | <a href="https://www.ncbi.nlm.nih.gov/assembly/GCF_000346735.0">https://www.ncbi.nlm.nih.gov/assembly/GCF_000346735.0</a>                                     | 0 |
| Pruper | <i>Prunus persica</i>         | Rosales        | Rosaceae         | 10.1038/ng.2586                                                                                                                                               | 0 |
| Pyrcom | <i>Pyrus communis</i>         | Rosales        | Rosaceae         | 10.1371/journal.pone.0092644                                                                                                                                  | 0 |
| Pyrbre | <i>Pyrus x bretschneideri</i> | Rosales        | Rosaceae         | <a href="https://www.ncbi.nlm.nih.gov/assembly/GCF_000315295.0">https://www.ncbi.nlm.nih.gov/assembly/GCF_000315295.0</a>                                     | 0 |
| Querob | <i>Quercus robur</i>          | Fagales        | Fagaceae         | 10.1111/1755-0998.12425                                                                                                                                       | 0 |
| Riccom | <i>Ricinus communis</i>       | Malpighiales   | Euphorbiaceae    | 10.1038/nbt.1674                                                                                                                                              | 0 |
| Roschi | <i>Rosa chinensis</i>         | Rosales        | Rosaceae         | 10.1038/s41588-018-0110-3                                                                                                                                     | 0 |
| Rubocc | <i>Rubus occidentalis</i>     | Rosales        | Rosaceae         | 10.1111/tpj.13215                                                                                                                                             | 0 |
| Setita | <i>Setaria italica</i>        | Poales         | Poaceae          | 10.1038/nbt.2196                                                                                                                                              | 0 |
| Solyc  | <i>Solanum lycopersicum</i>   | Solanales      | Solanaceae       | 10.1038/nature11119                                                                                                                                           | 0 |
| Solpen | <i>Solanum pennellii</i>      | Solanales      | Solanaceae       | 10.1038/ng.3046                                                                                                                                               | 0 |
| Sorbic | <i>Sorghum bicolor</i>        | Poales         | Poaceae          | 10.1111/tpj.13781                                                                                                                                             | 0 |
| Spiole | <i>Spinacia oleracea</i>      | Caryophyllales | Amaranthaceae    | <a href="http://bvseq.molgen.mpg.de/Genome/Download/Spinach/">http://bvseq.molgen.mpg.de/Genome/Download/Spinach/</a>                                         | 0 |
| Spipol | <i>Spirodela polyrhiza</i>    | Alismatales    | Araceae          | 10.1038/ncomms4311                                                                                                                                            | 0 |
| Tarhas | <i>Tarenaya hassleriana</i>   | Brassicales    | Cleomaceae       | 10.1105/tpc.113.113480                                                                                                                                        | 0 |
| Thecac | <i>Theobroma cacao</i>        | Malvales       | Malvaceae        | 10.1186/gb-2013-14-6-r53                                                                                                                                      | 0 |
| Treori | <i>Trema orientalis</i>       | Rosales        | Cannabaceae      | 10.1073/pnas.1721395115                                                                                                                                       | 0 |
| Tripra | <i>Trifolium pratense</i>     | Fabales        | Fabaceae         | 10.1038/srep17394                                                                                                                                             | 1 |
| Trisub | <i>Trifolium subterraneum</i> | Fabales        | Fabaceae         | <a href="https://www.ncbi.nlm.nih.gov/assembly/GCA_001742945.1#st">https://www.ncbi.nlm.nih.gov/assembly/GCA_001742945.1#st</a>                               | 1 |
| Utrgib | <i>Utricularia gibba</i>      | Lamiales       | Lentibulariaceae | 10.1073/pnas.1702072114                                                                                                                                       | 0 |

|        |                                    |             |             |                      |   |
|--------|------------------------------------|-------------|-------------|----------------------|---|
| Vigang | <i>Vigna angularis</i>             | Fabales     | Fabaceae    | 10.1038/srep080669   | 1 |
| Vigrad | <i>Vigna radiata</i>               | Fabales     | Fabaceae    | 10.1038/ncomms6443   | 1 |
| Vigung | <i>Vigna unguiculata</i>           | Fabales     | Fabaceae    | Phytozome            | 1 |
| Zeamay | <i>Zea mays PH207</i>              | Poales      | Poaceae     | 10.1105/tpc.16.00353 | 0 |
| Zizjuj | <i>Ziziphus jujuba cv. Dongzao</i> | Rosales     | Rhamnaceae  | 10.1038/ncomms6315   | 0 |
| Zosmar | <i>Zostera marina</i>              | Alismatales | Zosteraceae | 10.1038/nature16548  | 0 |

**Table S2: List of species investigated in this study. Related to STAR Methods.** The N-fixing column indicates if species can (1) or not (0) establish root nodule nitrogen-fixing symbiosis.

| Tree                         | Analyzed sequences | Analyzed sites | Tested branches                                       | Branch model - RELAX |               |                 |                    |
|------------------------------|--------------------|----------------|-------------------------------------------------------|----------------------|---------------|-----------------|--------------------|
|                              |                    |                |                                                       | K                    | LRT           | p-val           | Selective pressure |
| Syfo1/1L/3 angiosperm tree   | 280                | 766            | <i>Brassicaceae</i>                                   | <b>9,34</b>          | <b>202,89</b> | <b>0,00E+00</b> | intensification    |
|                              |                    |                | <i>Cucurbitales</i>                                   | <b>8,71</b>          | <b>47,34</b>  | <b>5,97E-12</b> | intensification    |
|                              |                    |                | <i>Fabales</i>                                        | <b>0,54</b>          | <b>22,32</b>  | <b>2,31E-06</b> | relaxation         |
|                              |                    |                | <i>Fagales</i>                                        | <b>1,73</b>          | <b>27,97</b>  | <b>1,23E-07</b> | intensification    |
|                              |                    |                | <i>Rosales</i>                                        | 0,96                 | 4,40          | 3,59E-02        |                    |
|                              |                    |                | NFN clade<br>( <i>Cuc, Fab, Fag and Ros</i> )         | <b>1,09</b>          | <b>15,82</b>  | <b>6,97E-05</b> | intensification    |
|                              |                    |                | <i>Syfo1 clade</i>                                    | <b>6,46</b>          | <b>52,89</b>  | <b>3,53E-13</b> | intensification    |
|                              |                    |                | <i>Syfo1 clade</i> infection threads forming species  | 0,84                 | 4,34          | 3,70E-02        |                    |
|                              |                    |                | <i>Syfo1L clade</i>                                   | <b>0,45</b>          | <b>40,61</b>  | <b>1,86E-10</b> | relaxation         |
|                              |                    |                | <i>Syfo1L clade</i> infection threads forming species | 0,96                 | 0,840         | 3,60E-01        |                    |
| Syfo1/1L NFN tree            | 107                | 779            | Infection threads forming species                     | <b>0,25</b>          | <b>18,63</b>  | <b>1,59E-05</b> | relaxation         |
|                              |                    |                | Syfo1 Infection threads forming species               | 0,87                 | 5,97          | 1,50E-02        |                    |
|                              |                    |                | Syfo1L Infection threads forming species              | 0,91                 | 5,96          | 1,50E-02        |                    |
| Syfo1/1L <i>Fabales</i> tree | 41                 | 758            | Infection threads forming species                     | <b>1,43</b>          | <b>16,76</b>  | <b>4,24E-05</b> | intensification    |
| Syfo1 <i>Fabales</i> tree    | 19                 | 800            | No Infection threads forming species                  | 0,95                 | 0,62          | 4,30E-01        |                    |
| Syfo1L <i>Fabales</i> tree   | 20                 | 772            | No Infection threads forming species                  | <b>0,66</b>          | <b>7,29</b>   | <b>7,00E-03</b> | relaxation         |

**Table S3: Results of the branch model analysis for signature of selection acting in the SYFO1/SYFO1L angiosperm clade on different branches of interest. Related to STAR Methods.** The column tree indicates which species and corresponding phylogenetic tree was used to run the branch model RELAX. Analyzed sequences and sites indicated the number of sequences and sites analyzed corresponding to the species/tree selected. The tested branches column indicates which clade was targeted as 'Foreground' to compare selective pressure against the rest of the tree. K represent the selection intensity parameter where a significant result of  $k > 1$  indicates that selection strength has been intensified along the test branches, and a significant result of  $k < 1$  indicates that selection strength has been relaxed along the test branches. LRT represent the Likelihood Ratio Test to comparing the alternative and null models from RELAX with the corresponding p-value. Bold p-values indicate significant at 0.01 threshold.

| <b>Primer</b> | <b>Sequence (5'-3')</b>             | <b>Used for</b>                                             | <b>References or referenced ID</b> |
|---------------|-------------------------------------|-------------------------------------------------------------|------------------------------------|
| gt-SYFO1-F    | AGCCACAATAACACAACCTCCT              | Genotyping                                                  | Medtr5g036540.1                    |
| gt-SYFO1-R    | GCCTTTGTTGTCTTCTTTTTCTGC            | Genotyping                                                  | Medtr5g036540.1                    |
| gt-SYFO2-F    | GCCAAAACAATTCTCCACAAAAC             | Genotyping                                                  | Medtr8g062830.1                    |
| gt-SYFO2-R    | TCCCAAGAAATCCTTAACTATACCA           | Genotyping                                                  | Medtr8g062830.1                    |
| TNT1-F        | GTAGAGAATAGGTAAGGTGCT               | Genotyping                                                  | S1                                 |
| TNT1-R        | TGTAGCACCGAGATACGGTAATTAACAAGA      | Genotyping                                                  | S1                                 |
| TNT1-R1       | TGTAGCACCGAGATACGGTAATTAACAAGA      | Genotyping                                                  | S1                                 |
| qUbi-F        | TTGTGTGTTGAATCCTAAGCA               | Housekeeping gene for qRT-PCR                               | S2                                 |
| qUbi-R        | CAAGACCCATGCAACAAGTTC               | Housekeeping gene for qRT-PCR                               | S2                                 |
| qSYFO1-F      | AGTAGCAGCAGCAGCGGAGA                | qRT-PCR for candidate prescreen and mutant transcript check | Medtr5g036540.1                    |
| qSYFO1-R      | TCCTTGCTGAGAGTGCTGAGA               | qRT-PCR for candidate prescreen and mutant transcript check | Medtr5g036540.1                    |
| qSYFO2-F      | G TTCAGAAACAAGGCTTTCAATCTCA         | qRT-PCR for candidate prescreen                             | Medtr8g062830.1                    |
| qSYFO2-R      | GATCATTGTTGGATTCTTGCATCATG          | qRT-PCR for candidate prescreen                             | Medtr8g062830.1                    |
| qSYFO2-F2     | GGTGAGAGAGGAAATTTTGTG               | qRT-PCR for mutant transcript check                         | Medtr8g062830.1                    |
| qSYFO2-R2     | ACCCCCACATT CATAACTG                | qRT-PCR for mutant transcript check                         | Medtr8g062830.1                    |
| pSYFO1-F      | ATGGTCTCAGCGGAGGGGCATGTTAATCACC     | Cloning                                                     | Medtr5g036540.1                    |
| pSYFO1-R      | TAGGTCTCTCAGAGAATGAAGAGGAACAAAGAT   | Cloning                                                     | Medtr5g036540.1                    |
| gSYFO1-F      | ATGGTCTCACACCATGTCTTTGAACATGATGTTTC | Cloning                                                     | Medtr5g036540.1                    |
| gSYFO1-R      | TAGGTCTCTCCTTAACTTTGTCTTAGGTGTTTC   | Cloning                                                     | Medtr5g036540.1                    |

|                         |                                          |         |                 |
|-------------------------|------------------------------------------|---------|-----------------|
| SYFO1 <sup>ECD</sup> -F | ATGGTCTCACACCATGTCTTTGAACATGATGTTTC      | Cloning | Medtr5g036540.1 |
| SYFO1 <sup>ECD</sup> -R | TAGGTCTCTCCTTTCACCTACTATTTGTTGAAGAATTTGT | Cloning | Medtr5g036540.1 |

**Table S4: List of primers used in this study. Related to STAR Methods.** Abbreviations: Forward (F) and reverse (R) primers, Ubiquitin (Ubi)

#### SUPPLEMENTAL REFERENCES

- <sup>S1</sup> Tadege, M., Wen, J.Q., He, J., Tu, H.D., Kwak, Y., Eschstruth, A., Cayrel, A., Endre, G., Zhao, P.X., Chabaud, M., et al. (2008). Large-scale insertional mutagenesis using the Tnt1 retrotransposon in the model legume *Medicago truncatula*. *Plant J.* 54, 335-347.
- <sup>S2</sup> Satge, C., Moreau, S., Sallet, E., Lefort, G., Auriac, M.C., Rembliere, C., Cottret, L., Gallardo, K., Noirot, C., Jardinaud, M.F., et al. (2016). Reprogramming of DNA methylation is critical for nodule development in *Medicago truncatula*. *Nat. Plants* 2, 1-10.
